# Supplementary material
Source: PubMed Central journal article supplement (PMC8054716)
Supplement: sj-pdf-3-jcb-10.1177_0271678X20944226.pdf [file sj-pdf-3-jcb-10.1177_0271678X20944226.pdf]

|                                                 |                   | Wild Type<br>(N=11)  |      | rTg-DI<br>(N=10)     |      |       |      |         |        |       |
|-------------------------------------------------|-------------------|----------------------|------|----------------------|------|-------|------|---------|--------|-------|
| Tissue Compartment                              | Age group (month) | Mean mm <sup>3</sup> | SE   | Mean mm <sup>3</sup> | SE   | Diff  | SE   | P-value | L95%   | U95%  |
| Gray Matter Volume (mm <sup>3</sup> )           | 3                 | 1137.2               | 9.8  | 1124.6               | 12.3 | -12.7 | 15.7 | 0.430   | -45.4  | 20.1  |
|                                                 | 6                 | 1108.5               | 11.1 | 1123.1               | 9.8  | 14.6  | 14.7 | 0.334   | -16.2  | 45.4  |
|                                                 | 9                 | 1083.0               | 10.9 | 1086.1               | 13.6 | 3.1   | 17.4 | 0.861   | -33.2  | 39.4  |
|                                                 | 11                | 1077.7               | 11.4 | 1080.4               | 12.0 | 2.7   | 16.6 | 0.872   | -31.8  | 37.3  |
| White Matter Volume (mm <sup>3</sup> )          | 3                 | 554.4                | 5.8  | 531.6                | 8.7  | -22.8 | 10.5 | 0.042   | -44.6  | -0.9  |
|                                                 | 6                 | 603.3                | 6.5  | 590.1                | 9.0  | -13.3 | 11.1 | 0.244   | -36.3  | 9.8   |
|                                                 | 9                 | 601.2                | 6.0  | 549.5                | 8.1  | -51.7 | 10.1 | <0.001  | -72.7  | -30.7 |
|                                                 | 11                | 605.8                | 6.9  | 531.2                | 7.5  | -74.5 | 10.1 | <0.001  | -95.7  | -53.4 |
| Cerebral Spinal Fluid Volume (mm <sup>3</sup> ) | 3                 | 260.2                | 6.1  | 247.5                | 5.3  | -12.7 | 8.1  | 0.131   | -29.5  | 4.1   |
|                                                 | 6                 | 278.2                | 6.6  | 264.0                | 4.8  | -14.2 | 8.1  | 0.096   | -31.1  | 2.7   |
|                                                 | 9                 | 258.0                | 5.5  | 267.8                | 5.6  | 9.8   | 7.9  | 0.229   | -6.6   | 26.1  |
|                                                 | 11                | 251.3                | 6.2  | 289.6                | 6.7  | 38.3  | 9.1  | <0.001  | 19.2   | 57.3  |
| Total Intracranial (mm <sup>3</sup> )           | 3                 | 1951.8               | 18.1 | 1903.7               | 20.8 | -48.1 | 27.6 | 0.096   | -105.6 | 9.4   |
|                                                 | 6                 | 1990.1               | 19.3 | 1977.2               | 21.7 | -12.9 | 29.1 | 0.663   | -73.5  | 47.8  |
|                                                 | 9                 | 1942.2               | 19.1 | 1903.4               | 20.6 | -38.9 | 28.0 | 0.181   | -97.3  | 19.6  |
|                                                 | 11                | 1934.8               | 20.8 | 1901.3               | 19.9 | -33.6 | 28.8 | 0.257   | -93.6  | 26.5  |

Supplementary Table 1: Summary of volume

**umetric tissue compartment changes in WT and rTg-DI rats**

Data are presented a means and SE's Generalized Estimating Equations (GEE). Mean differences compare rTg-DI vs WT groups at each age group.

| Age group midpoints* (month) | Wild Type |       | rTg-DI  |       | Diff   | SE    | P-value          | L95%   |
|------------------------------|-----------|-------|---------|-------|--------|-------|------------------|--------|
|                              | Mean FA   | SE    | Mean FA | SE    |        |       |                  |        |
| 3.28 ± 0.19                  | 0.370     | 0.003 | 0.368   | 0.002 | -0.003 | 0.004 | 0.421            | -0.010 |
| 6.23 ± 0.50                  | 0.377     | 0.004 | 0.369   | 0.004 | -0.009 | 0.005 | 0.114            | -0.019 |
| 8.22 ± 0.45                  | 0.387     | 0.003 | 0.378   | 0.002 | -0.010 | 0.004 | <b>0.010</b>     | -0.017 |
| 11.33 ± 0.55                 | 0.402     | 0.002 | 0.375   | 0.002 | -0.026 | 0.002 | <b>&lt;0.001</b> | -0.031 |

**Supplementary Table 2: Summary of FA changes in white matter compartment in WT and rTg-DI rats**

Data are presented as means and SE's Generalized Estimating Equations (GEE). Pairwise comparisons between the two strains at each age were investigated. The p-values were not adjusted for multiple comparisons

\*The age categories for statistical analysis comparison of FA values between the two strains are listed. These age groupings were used for the statistical analysis as well as for the voxel-wise analysis. The number of rats and gender distribution for each age group are as follows: 3 month groups: WT, N=7 (7 Females, 0 Males); rTg-DI, N=7 (7 Females, 0 Males); 6 month groups: WT, N=15 (11 Females, 4 Males); rTg-DI, N=14 (11 Females, 3 Males); 8 month groups: WT, N=10 (9 Females, 1 Male); rTg-DI, N=10 (8 Females, 2 Males); 11 month groups: WT, N=12 (10 Females, 2 Males); rTg-DI, N=13 (11 Females, 2 Males).

|                                                        |                      | Wild Type<br>(N=11) |       | rTg-DI<br>(N=10) |       |      |       |                 |       |      |
|--------------------------------------------------------|----------------------|---------------------|-------|------------------|-------|------|-------|-----------------|-------|------|
| Parameter                                              | Age group<br>(month) | Mean                | SE    | Mean             | SE    | Diff | SE    | P-value         | L95%  | U95% |
| T2*<br>Thalamus<br>(ms)                                | 3                    | 28.9                | 0.20  | 28.9             | 0.26  | 0.01 | 0.33  | 0.988           | -0.7  | 0.7  |
|                                                        | 6                    | 29.6                | 0.32  | 27.8             | 0.30  | -1.8 | 0.44  | <b>0.001</b>    | -2.7  | -0.9 |
|                                                        | 9                    | 28.8                | 0.36  | 25.9             | 0.25  | -2.9 | 0.44  | <b>&lt;.001</b> | -3.8  | -2.0 |
|                                                        | 11                   | 28.4                | 0.24  | 25.4             | 0.17  | -3.0 | 0.29  | <b>&lt;.001</b> | -3.6  | -2.4 |
| Thalamic<br>Microbleed<br>Volume<br>(mm <sup>3</sup> ) | 3                    | 0.61                | 0.076 | 0.80             | 0.130 | 0.19 | 0.150 | 0.229           | -0.13 | 0.50 |
|                                                        | 6                    | 0.43                | 0.101 | 1.27             | 0.294 | 0.84 | 0.311 | <b>0.013</b>    | 0.19  | 1.49 |
|                                                        | 9                    | 0.47                | 0.118 | 4.90             | 0.543 | 4.43 | 0.556 | <b>0.000</b>    | 3.27  | 5.59 |
|                                                        | 11                   | 0.76                | 0.121 | 6.96             | 0.448 | 6.20 | 0.464 | <b>0.000</b>    | 5.23  | 7.17 |

**Supplementary Table 3: Summary of T2\* Microbleed Volume changes WT and rTg-DI rats**

Data are presented a means and SE's Generalized Estimating Equations (GEE). Pairwise comparisons between the two strains at each age were investigated. The p-values were not adjusted for multiple comparisons
